# Supplementary material for: Involvement of CRMP2 Phosphorylation in Amyloid Beta-induced Tau Phosphorylation of Hippocampal Neurons in Alzheimer’s Disease Mouse Model
Source: Springer Nature journal article supplement (doi:10.1007/s12035-025-04721-y), 2025-02-01
Supplement: MOESM1 [file 12035_2025_4721_MOESM1_ESM.pdf]

## Supplemental Information

### Involvement of CRMP2 phosphorylation in amyloid beta-induced tau phosphorylation of hippocampal neurons in Alzheimer's disease mouse models

Daisuke Noguchi<sup>1</sup>, Naoto Watamura<sup>1</sup>, Miyu Nikkuni<sup>1</sup>, Takaomi C Saido<sup>2</sup>, Yoshio Goshima<sup>3</sup>, Toshio Ohshima<sup>1,4</sup>

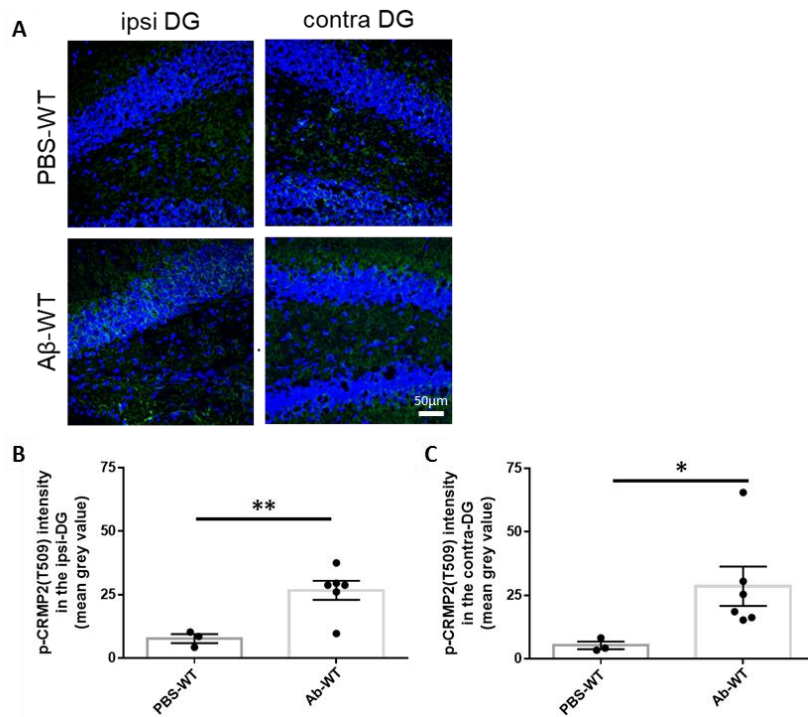

**Supplementary Fig1. CRMP2 phosphorylation at T509 was significantly upregulated in the hippocampus of Aβ-injected WT mice.**

(A) Representative images of immunostaining with anti-CRMP2 (phospho T509) antibody (green) in the ipsilateral and contralateral sides of the hippocampus dentate gyrus (DG) from PBS-injected and Aβ25-35-injected WT mice. Nuclear counterstaining is shown in blue. Scale bar 50 μm. (B)-(C) Quantification of the mean gray value of p-CRMP2(T509)-positive intensity in the ipsilateral DG (B) and contralateral DG (C). Groups compared using unpaired two-tailed Student's t-tests with Welch's correction and confidence intervals of 95% used. Data expressed as mean ± standard error of the mean (SEM). PBS-WT, n=3; Aβ-WT, n=6. \*P<0.05, and \*\*P<0.01.

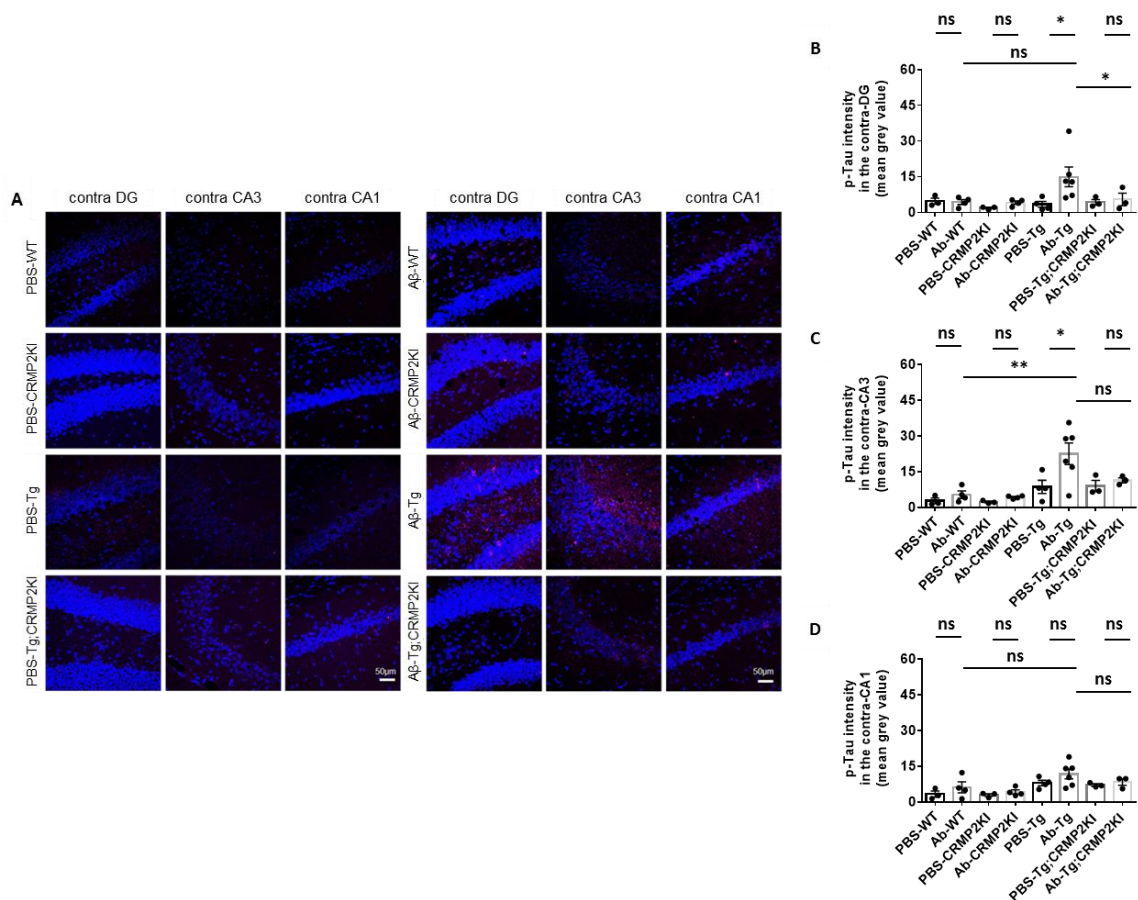

**Supplemental Fig2. Tau phosphorylation in the contralateral hippocampus was significantly upregulated Aβ-injected tau Tg mice**

(A) Representative images of immunostaining with anti-AT8 antibody (magenta) in the contralateral hippocampus from WT, CRMP2KI, tau Tg (Tg), and tau Tg; CRMP2KI mice injected with PBS or Aβ<sub>25-35</sub>. Nuclear counterstaining is shown in blue. Scale bar = 50 μm. (B)-(D) Quantification of the mean gray value of AT8 positive intensity in the contralateral DG (B), CA3 region (C), CA1 region (D). Tukey's multiple comparison test with Geisser-Greenhouse correction used to compare multiple groups. Data expressed as mean ± standard error of the mean (SEM). PBS-WT, n=3; Aβ-WT, n=4; PBS-2KI, n=3; Aβ-2KI, n=4; PBS-Tg, n=4; Aβ-Tg, n=6; PBS-Tg;2KI, n=3 and Aβ-Tg;2KI, n=3. ns, not significant. \*P<0.05, \*\*P<0.01.

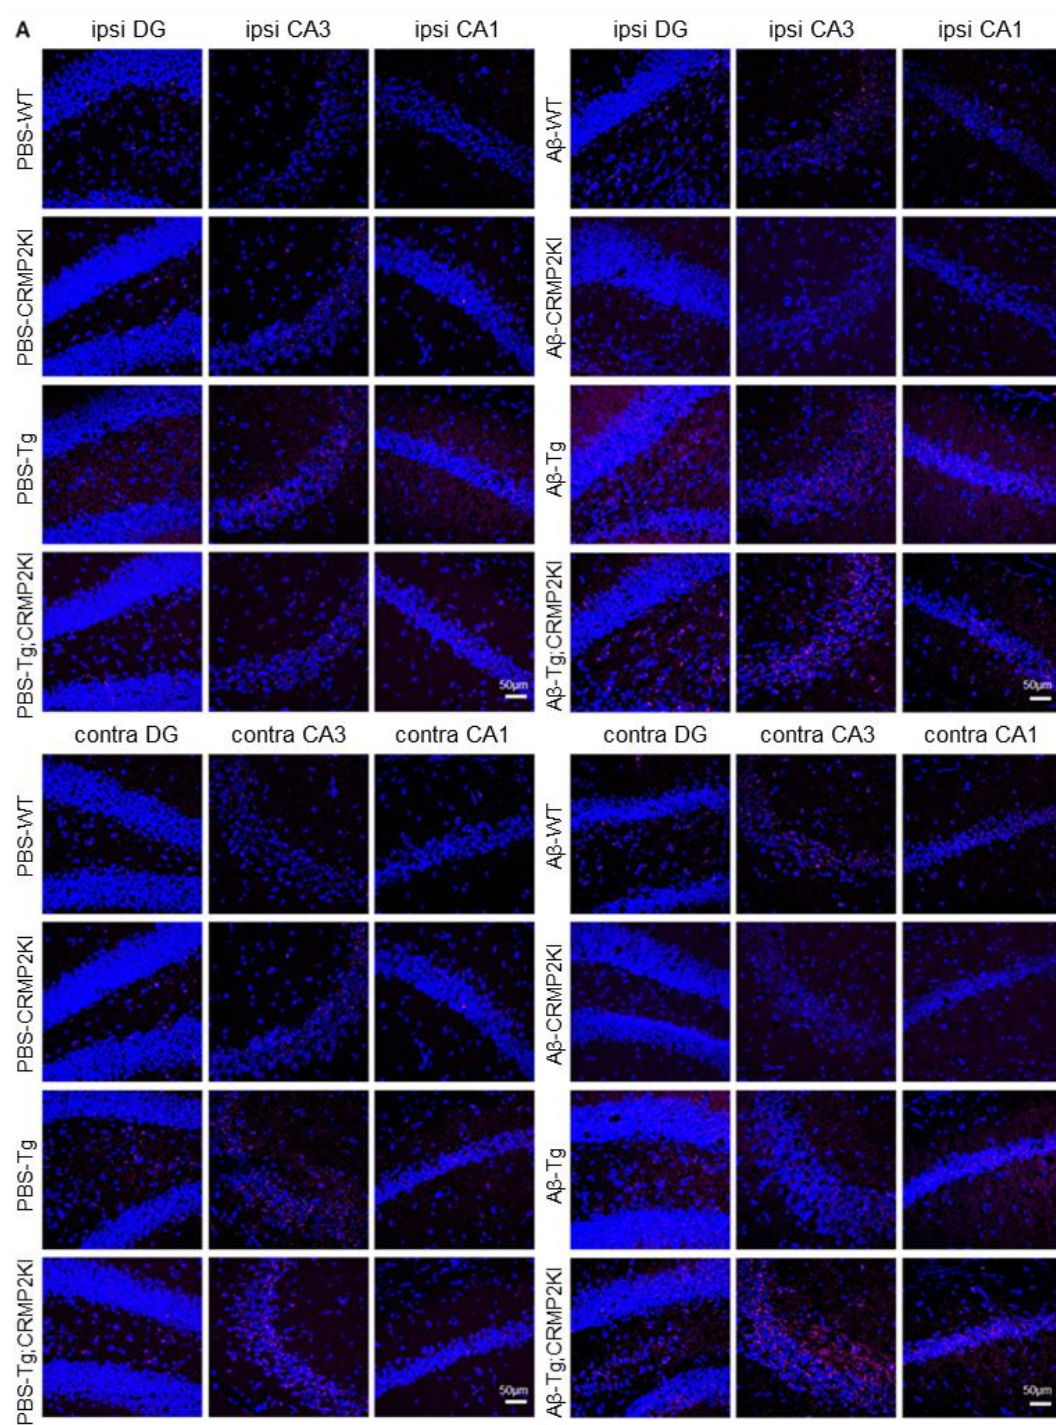

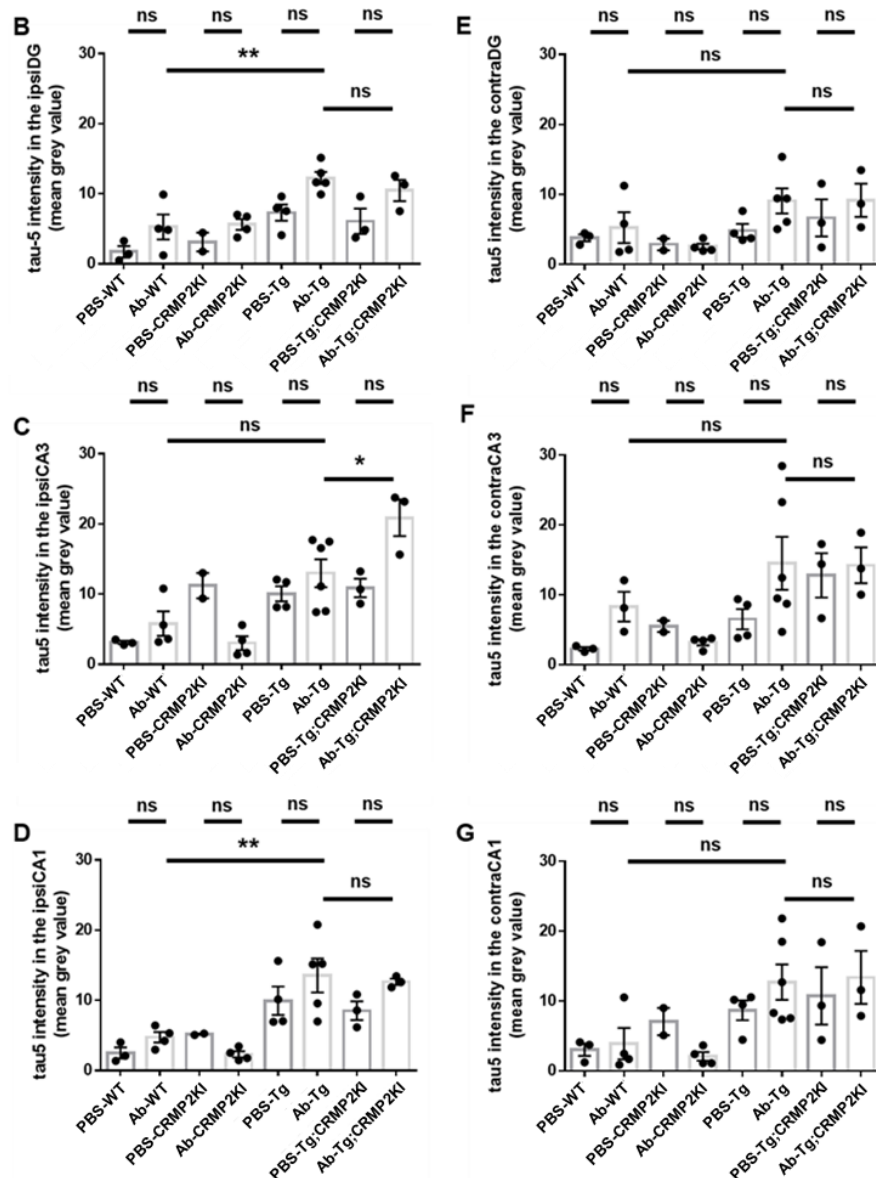

**Supplementary Fig3. Immunostaining with anti-tau5 antibody in the hippocampus from PBS and A $\beta$ 25-35 injection samples.**

(A) Images of immunostaining with anti-tau-5 antibody (magenta) in the contralateral hippocampus from WT, CRMP2KI, tau Tg (Tg), and tau Tg; CRMP2KI mice injected with PBS or A $\beta$ 25-35. Scale bar = 50  $\mu$ m. (B)–(F) Quantification of the mean gray value of tau-5 positive intensity in the ipsilateral and contralateral DG, CA3, and CA1 region. Tukey's multiple comparison test with Geisser-Greenhouse correction used to compare multiple groups. Data expressed as mean  $\pm$  standard error of the mean (SEM). PBS-WT, n=3; A $\beta$ -WT, n=4; PBS-2KI, n=3; A $\beta$ -2KI, n=4; PBS-Tg, n=4; A $\beta$ -Tg, n=6; PBS-Tg;2KI, n=3 and A $\beta$ -Tg;2KI, n=3. ns, not significant. \*P<0.05, and \*\*P<0.01.



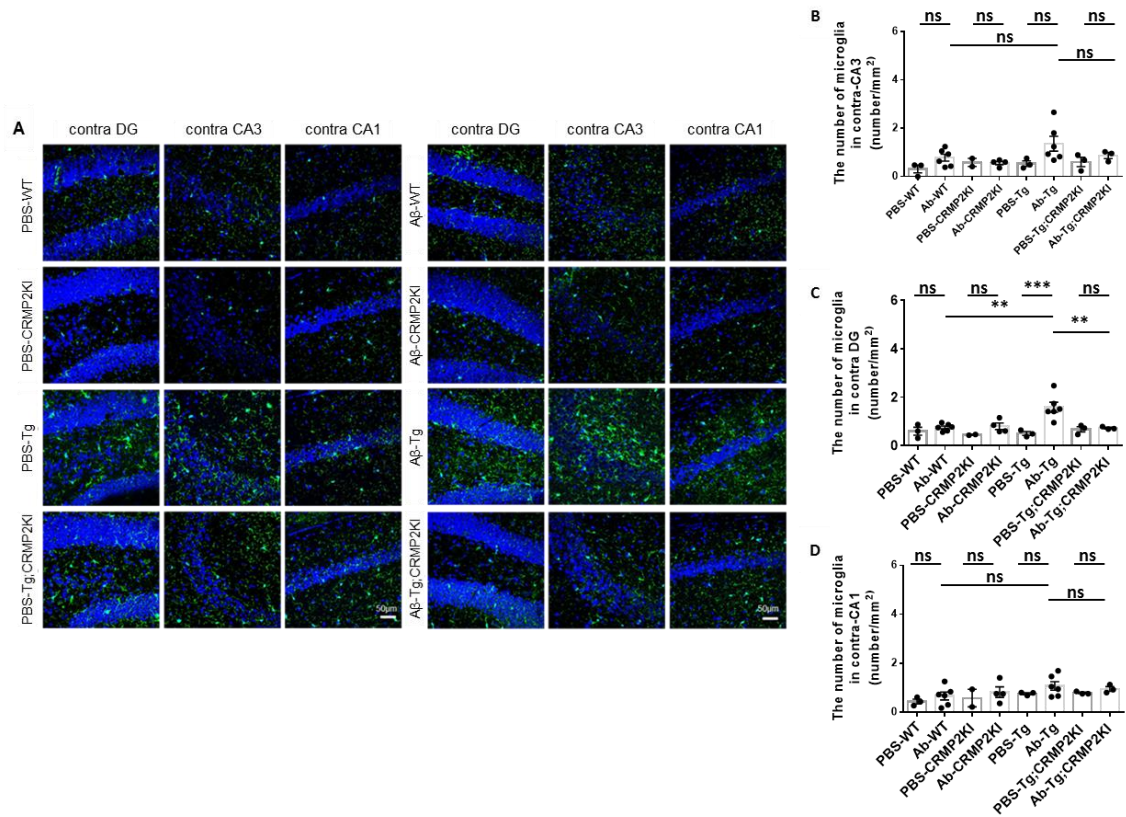

**Supplemental Fig4. Microglial activation was alleviated in the contralateral hippocampus DG in Aβ-injected tau Tg; CRMP2KI than in Aβ-injected tau Tg mice.**

(A) Representative images of immunostaining with anti-Iba1 antibody (green) in the contralateral hippocampus from WT, CRMP2KI, tau Tg (Tg), and tau Tg; CRMP2KI mice injected with PBS or Aβ<sub>25-35</sub>. Scale bar = 50 μm. (B-D) Quantification of the mean gray value of Iba1-positive intensity in the contralateral DG (B), CA3 (C) and CA1 region (D). Tukey's multiple comparison test with Geisser-Greenhouse correction was used to compare multiple groups. Data are shown as mean ± standard error of the mean (SEM). ns, not significant. \*\*P<0.01, and \*\*\*P<0.005.
